# Supplementary material for: A general mechanism for initiating the bacterial general stress response
Source: eLife journal article supplement (doi:10.7554/elife.100376), 2024-09-12

**Figure 4 - Supplemental Figure 1 - source data 1:** PDF file of original uncropped gel images of gels shown in Figure 4 - Supplemental Figure 1 B (top) and D (bottom).

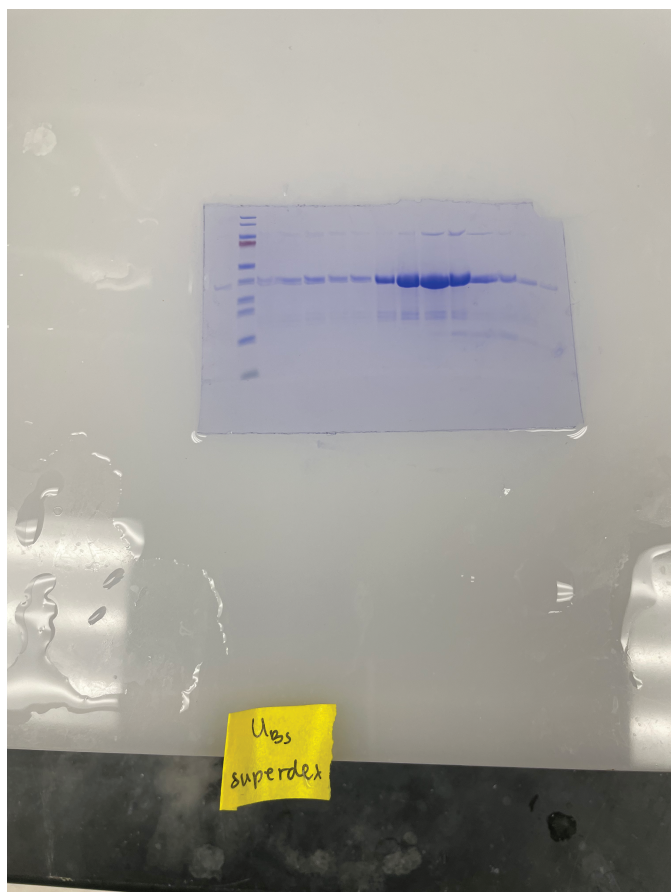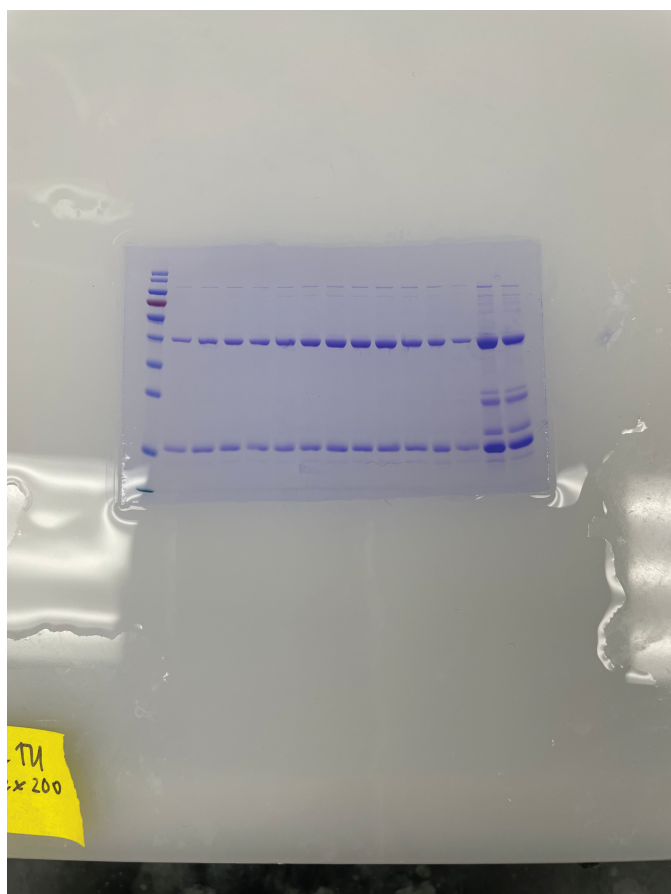

Supplement: fig4-figsupp1-data1 [file elife-100376-fig4-figsupp1-data1-v1.pdf]
